# Supplementary material
Source: PubMed Central journal article supplement (PMC2732298)
Supplement: btp041_1.pdf [file btp041_1.pdf]

# Supplementary Tables

Tong Tong Wu<sup>1</sup>  
Department of Epidemiology  
and Biostatistics<sup>1</sup>  
University of Maryland  
College Park, MD 20742

Yi Fang Chen<sup>2</sup>  
Trevor Hastie<sup>3</sup>  
Departments of Biostatistics<sup>3</sup>  
and Statistics<sup>2,3</sup> Stanford University  
Stanford, CA 94305

Eric Sobel<sup>4</sup>  
Kenneth Lange<sup>5</sup>  
Departments of Biomathematics<sup>5</sup>,  
Human Genetics<sup>4,5</sup>, and Statistics<sup>5</sup>  
University of California  
Los Angeles, CA 90095

Research supported in part by USPHS grants  
GM53275 and MH59490 to KL.

December 11, 2008

| Stage          | Predictor | Estimate  | Re-Estimate | LOO Index              |                        |
|----------------|-----------|-----------|-------------|------------------------|------------------------|
| stage 1        | intercept | 0.545595  | 0.728509    | $1.43 \times 10^{-33}$ |                        |
|                | 1         | 0.453759  | 0.845769    | $1.20 \times 10^{-44}$ |                        |
|                | 2         | 0.510842  | 0.861629    | $1.42 \times 10^{-46}$ |                        |
|                | 3         | 0.491764  | 0.890518    | $2.61 \times 10^{-49}$ |                        |
|                | 4         | 0.454013  | 0.816184    | $3.51 \times 10^{-42}$ |                        |
|                | 5         | 0.501952  | 0.878312    | $4.43 \times 10^{-48}$ |                        |
|                | 4539      | 0.011196  | 0.250380    | $3.10 \times 10^{-5}$  |                        |
|                | 11139     | 0.003566  | 0.210031    | $4.74 \times 10^{-4}$  |                        |
|                | 38488     | -0.032609 | -0.254051   | $2.37 \times 10^{-5}$  |                        |
|                | 40873     | 0.005486  | 0.225850    | $1.69 \times 10^{-4}$  |                        |
|                | 41940     | 0.003740  | 0.251092    | $3.00 \times 10^{-5}$  |                        |
|                | stage 2   | intercept | 0.773912    | 0.941361               | $2.32 \times 10^{-41}$ |
|                |           | 1         | 0.756416    | 1.013921               | $4.10 \times 10^{-51}$ |
|                |           | 2         | 0.786718    | 1.035628               | $1.51 \times 10^{-54}$ |
| 3              |           | 0.782830  | 0.997106    | $7.53 \times 10^{-52}$ |                        |
| 4              |           | 0.721151  | 0.924619    | $1.41 \times 10^{-46}$ |                        |
| 5              |           | 0.765849  | 0.987843    | $5.45 \times 10^{-51}$ |                        |
| 4539           |           | 0.139176  | 0.243901    | $1.27 \times 10^{-4}$  |                        |
| 11139          |           | 0.103267  | 0.173203    | $7.79 \times 10^{-3}$  |                        |
| 38488          |           | -0.153611 | -0.252603   | $9.12 \times 10^{-5}$  |                        |
| 40873          |           | 0.125567  | 0.216078    | $7.79 \times 10^{-4}$  |                        |
| 41940          |           | 0.149134  | 0.268759    | $2.47 \times 10^{-5}$  |                        |
| (1, 2)         |           | 0.386519  | 0.590341    | $7.85 \times 10^{-18}$ |                        |
| (1, 3)         |           | -0.003071 | -0.068879   | $3.03 \times 10^{-1}$  |                        |
| (1, 40873)     |           | -0.002404 | -0.093550   | $1.47 \times 10^{-1}$  |                        |
| (1, 11139)     |           | -0.083311 | -0.155757   | $1.80 \times 10^{-2}$  |                        |
| (3, 4)         |           | 0.333400  | 0.448477    | $1.02 \times 10^{-10}$ |                        |
| (3, 5)         |           | -0.028741 | -0.147503   | $3.89 \times 10^{-2}$  |                        |
| (3, 38488)     |           | 0.002003  | 0.082573    | $2.00 \times 10^{-1}$  |                        |
| (4, 5)         |           | -0.029467 | -0.119982   | $9.00 \times 10^{-2}$  |                        |
| (5, 11139)     |           | 0.001000  | 0.097628    | $1.32 \times 10^{-1}$  |                        |
| (11139, 38488) |           | -0.034649 | -0.131892   | $3.85 \times 10^{-2}$  |                        |

Table 1: Results for one simulated sample with  $(p, n) = (50000, 2000)$ ,  $\rho = 0$ , and  $(s_1, s_2) = (10, 20)$ .

| SNP        | Chr | Position<br>in BP | Univariate<br>$p$ -value |
|------------|-----|-------------------|--------------------------|
| rs13119723 | 4   | 123437763         | $2.57 \times 10^{-7}$    |
| rs6822844  | 4   | 123728871         | $3.11 \times 10^{-6}$    |
| rs2187668  | 6   | 32713862          | $9.48 \times 10^{-191}$  |
| rs9275141  | 6   | 32759095          | $2.29 \times 10^{-34}$   |
| rs9357152  | 6   | 32772938          | $1.13 \times 10^{-58}$   |

Table 2: Important SNPs found by van Heel et al. (2007). P-values were computed via simple logistic regression without a penalty.

| SNP       | Chr | Position<br>in BP | Univariate<br>$p$ -value | LOO<br>Index | Estimate |
|-----------|-----|-------------------|--------------------------|--------------|----------|
| gender    |     |                   | 2.77489e-25              | 2.51469e-20  | 0.56017  |
| rs3131379 | 6   | 31829012          | 1.07612e-164             | 0.054429     | -0.39834 |
| rs204999  | 6   | 32217957          | 1.73018e-118             | 0.079370     | -0.24338 |
| rs204991  | 6   | 32269344          | 4.46217e-135             | 0.909736     | -0.01138 |
| rs204990  | 6   | 32269408          | 1.53373e-134             | 0.852021     | 0.05620  |
| rs404890  | 6   | 32306845          | 3.82540e-95              | 0.000181     | 0.45793  |
| rs2050189 | 6   | 32447625          | 1.55576e-109             | 0.100375     | -0.18849 |
| rs2187668 | 6   | 32713862          | 9.48302e-191             | 5.90959e-15  | -1.49657 |
| rs6457617 | 6   | 32771829          | 2.95796e-94              | 0.030264     | 0.26331  |
| rs7756516 | 6   | 32831895          | 3.20700e-64              | 0.000774     | 0.38224  |

Table 3: Ten HLA SNPs on chromosome 6 found under model 2 with 10 mandated predictors.

| SNP        | Chr | Position<br>in BP | Univariate<br>$p$ -value | LOO<br>Index | Estimate |
|------------|-----|-------------------|--------------------------|--------------|----------|
| gender     |     |                   | 2.77489e-25              | 1.63749e-24  | 0.50054  |
| rs6762743  | 3   | 180494694         | 8.41159e-07              | 3.41469e-07  | 0.38930  |
| rs1464510  | 3   | 189595248         | 5.64234e-05              | 2.24991e-06  | -0.33272 |
| rs10505604 | 8   | 134096770         | 4.38312e-06              | 3.17612e-06  | -0.36058 |
| rs1499447  | 8   | 138051471         | 3.90991e-11              | 2.52467e-11  | 0.52529  |
| rs4469515  | 9   | 1329391           | 4.21885e-06              | 0.000185     | -0.26789 |
| rs1064891  | 10  | 6316580           | 3.41871e-06              | 4.65117e-06  | -0.31409 |
| rs276892   | 11  | 3732947           | 2.24713e-05              | 3.42195e-05  | 0.28150  |
| rs7159238  | 14  | 81135391          | 6.94541e-06              | 3.22242e-05  | -0.28179 |
| rs3809983  | 18  | 54353748          | 3.00546e-06              | 5.19267e-05  | -0.27791 |

Table 4: The non-HLA predictors found under model 4 with 10 mandated predictors and HLA SNPs excluded.
